# Supplementary material for: Dopaminergic signaling supports auditory social learning
Source: PubMed Central journal article supplement (PMC8222360; doi:10.1038/s41598-021-92524-1), 2021-06-23
Supplement: 41598_2021_92524_MOESM1_ESM.pdf [file 41598_2021_92524_MOESM1_ESM.pdf]

**Title** Dopaminergic signaling supports auditory social learning

**Authors** Nihaad Paraouty, Catherine R. Rizzuto, Dan H. Sanes

### **Supplementary Information**

**Supplementary Figures 1-4 and Figure legends**

## Supplementary Figure 1

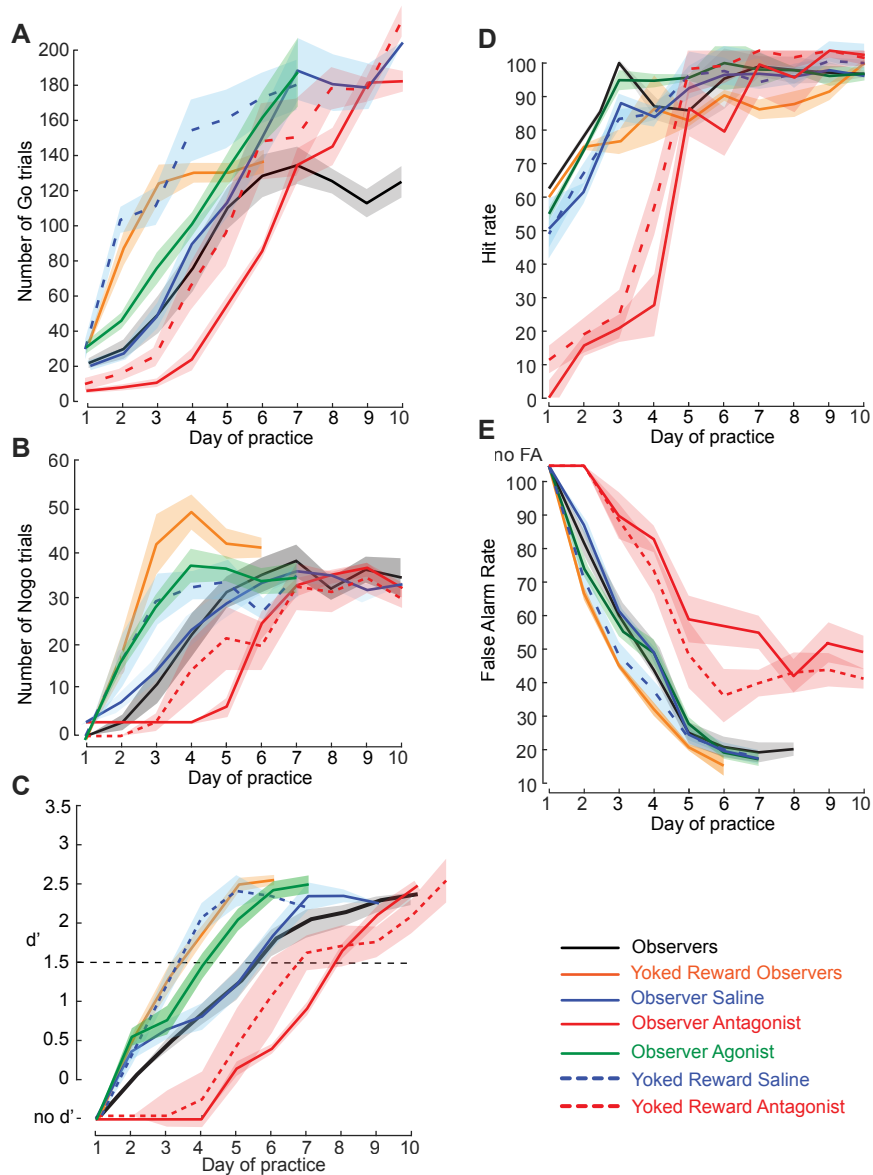

### *Comparison of behavioral performance of all experimental groups across practice days.*

**A.** Mean number of Go trials  $\pm$  SEM initiated by all observers in the seven different experimental groups of observers across practice days. **B.** Mean number of Nogo trials  $\pm$  SEM initiated across practice days. **C.** Mean  $d'$   $\pm$  SEM across practice days. **D.** Mean hit rate  $\pm$  SEM across practice days. **E.** Mean false alarm rate  $\pm$  SEM across practice days. Mixed-model ANOVAs were used to reveal significant group differences, followed by Holm-Bonferroni-corrected post-hoc comparisons.

## Supplementary Figure 2

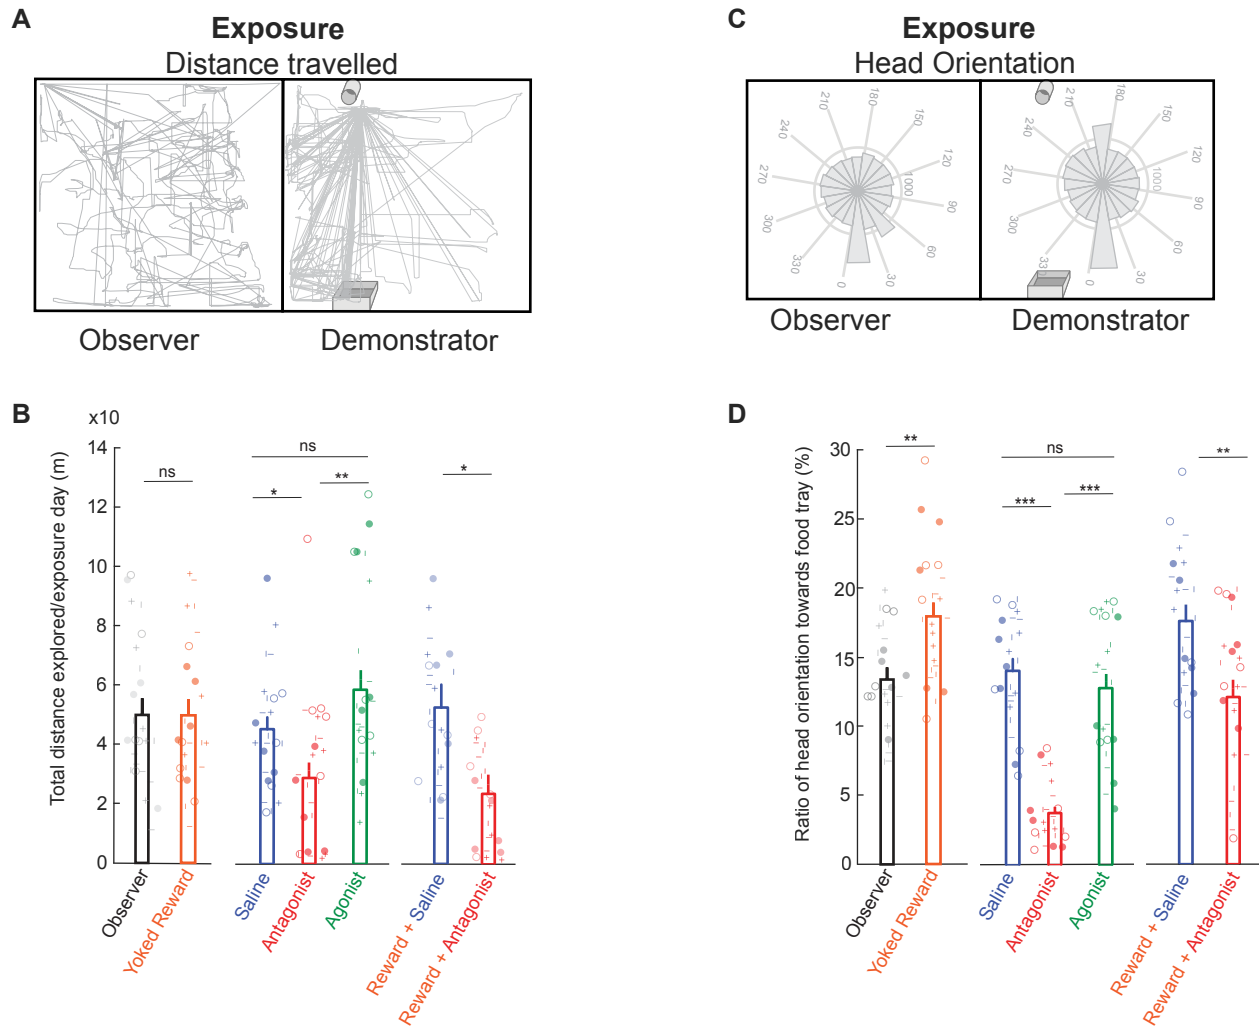

### **Administration of dopamine antagonist impacts the general behavior of observers.**

**A.** Illustration of the distance travelled by a demonstrator and an observer during 1 example exposure session. **B.** Mean distance explored per exposure day for a subset of 5 observers in each of the different observer groups: left-naïve observers (black) and yoked reward observers (orange); middle- observers which received saline (blue), or a dopamine antagonist (red), or a dopamine agonist (green); right- yoked reward observers which received saline (blue), or a dopamine antagonist (red). The analysis of distance travelled was performed on the same number of frames (first 20 minutes) of each of the five daily exposure sessions. **C.** Illustration of the head orientation of a demonstrator and an observer during 1 example exposure session. **D.** Mean ratio of head orientation for the 0-18° which corresponds to the food tray for the same subset of 5 observers (as in B). Asterisks denote statistically significant post-hoc differences at the following levels: \*  $p < 0.05$  and \*\*  $p < 0.01$ .

## Supplementary Figure 3

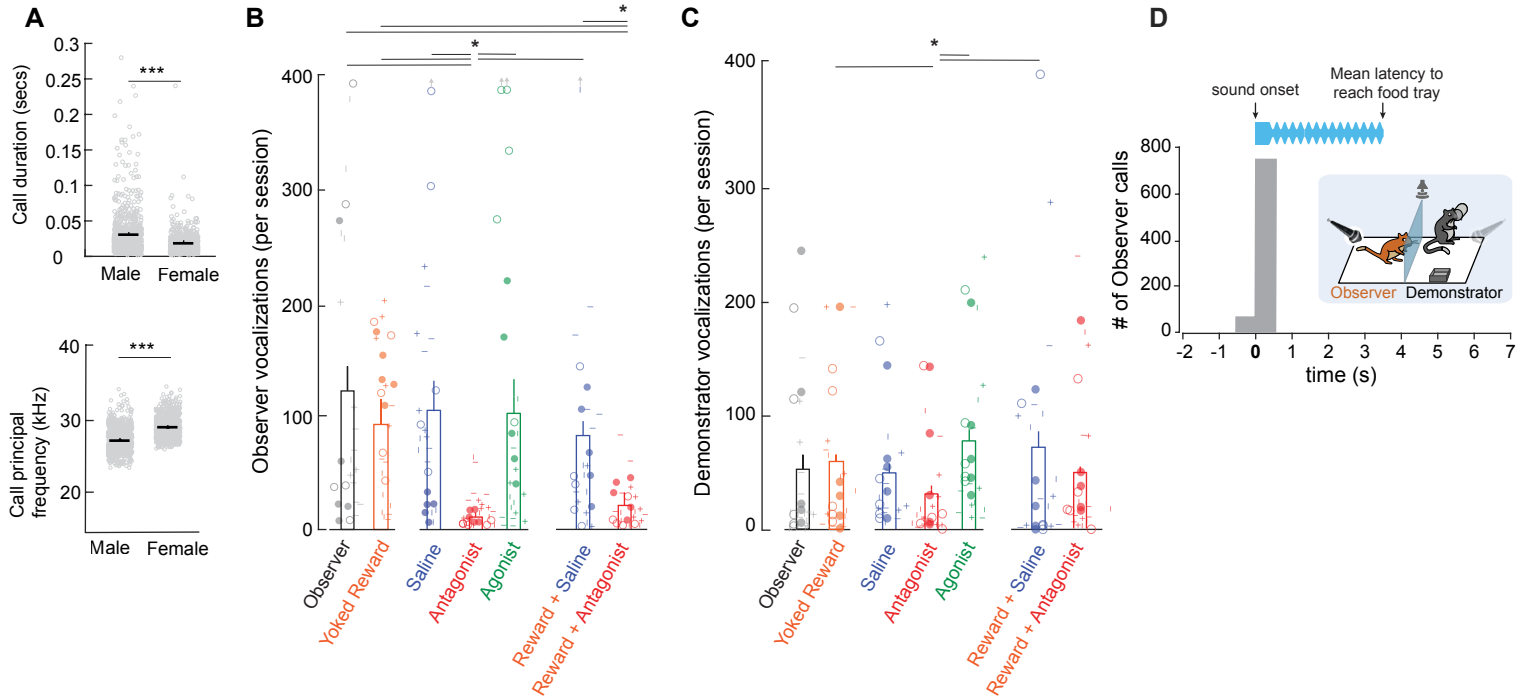

### *Administration of dopamine antagonist impacts observer vocalizations.*

**A.** Sex differences in terms of call duration (top) and call frequency (bottom) for all observers and demonstrators. **B.** Mean number of calls of 5 observers (shown in different symbols) in each of the seven observer groups during the first 20 minutes of the audio recordings for each of the five daily exposure sessions. **C.** Mean number of calls of 5 demonstrators (same demonstrator-observer pairs in B and C) during the first 20 minutes of the audio recordings for each of the five daily exposure sessions. **D.** Histogram of time-locked observer vocalizations (22% of all observers vocalizations) as a function of the sound stimulus onset.

# Supplementary Figure 4

| Exposure session                                                                   | 5 exposure sessions prior to practice                                                                                                                                               | Interleaved exposure (5) and practice sessions                                                                                                                                                   | Exposure with non-cagemate demonstrators                                                                                                                                                                                                                                                                                                                                                                                                                                                                                                                                                                                                                                                                                                                                                                                                                                                                                                                                                                                                                         |                                                                                                                                                                          |
|------------------------------------------------------------------------------------|-------------------------------------------------------------------------------------------------------------------------------------------------------------------------------------|--------------------------------------------------------------------------------------------------------------------------------------------------------------------------------------------------|------------------------------------------------------------------------------------------------------------------------------------------------------------------------------------------------------------------------------------------------------------------------------------------------------------------------------------------------------------------------------------------------------------------------------------------------------------------------------------------------------------------------------------------------------------------------------------------------------------------------------------------------------------------------------------------------------------------------------------------------------------------------------------------------------------------------------------------------------------------------------------------------------------------------------------------------------------------------------------------------------------------------------------------------------------------|--------------------------------------------------------------------------------------------------------------------------------------------------------------------------|
| 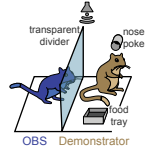   | Figure 1 (Paraouty et al., 2020)<br>Days to criterion d' = $6.0 \pm 0.9$ days<br>% reaching criterion = 100% (n=8)<br>days to learn Go = 1.6 days<br>days to learn Nogo = 4.4 days  | Supplementary Figure 4 (Paraouty et al., 2020)<br>Days to criterion d' = $5.5 \pm 0.4$ days<br>% reaching criterion = 100% (n=6)<br>days to learn Go = 2 days<br>days to learn Nogo = 3.7 days   | Supplementary Figure 3 (Paraouty et al., 2020)<br>Days to criterion d' = $6.1 \pm 0.6$ days<br>% reaching criterion = 100% (n=6)<br>days to learn Go = 1.8 days<br>days to learn Nogo = 3.2 days                                                                                                                                                                                                                                                                                                                                                                                                                                                                                                                                                                                                                                                                                                                                                                                                                                                                 |                                                                                                                                                                          |
|    | Figure 3 (Paraouty et al., 2020)<br>Days to criterion d' = $4.9 \pm 0.4$ days<br>% reaching criterion = 100% (n=10)<br>days to learn Go = 1.8 days<br>days to learn Nogo = 3.1 days | Supplementary Figure 4 (Paraouty et al., 2020)<br>Days to criterion d' = $6.7 \pm 0.3$ days<br>% reaching criterion = 100% (n=9)<br>days to learn Go = 2.2 days<br>days to learn Nogo = 4.4 days | <p>Replication - Exposure with non-cagemate demonstrators</p> <p>Figure 1A (current study)<br/>Days to criterion d' = <math>5.6 \pm 0.4</math> days<br/>% reaching criterion = 100% (n=13)<br/>days to learn Go = 2.9 days<br/>days to learn Nogo = 3 days</p> <p>Exposure with non-cagemate demonstrators + saline</p> <p>Figure 2B (current study)<br/>Days to criterion d' = <math>5.6 \pm 0.3</math> days<br/>% reaching criterion = 100% (n=13)<br/>days to learn Go = 2.5 days<br/>days to learn Nogo = 3.3 days</p> <p>Exposure with non-cagemate demonstrators + D1/D5 agonist</p> <p>Figure 3A (current study)<br/>Days to criterion d' = <math>4.2 \pm 0.2</math> days<br/>% reaching criterion = 100% (n=11)<br/>days to learn Go = 1 day<br/>days to learn Nogo = 3.2 days</p> <p>Exposure with non-cagemate demonstrators + D1/D5 antagonist</p> <p>Figure 2A (current study)<br/>Days to criterion d' = <math>8.3 \pm 0.2</math> days<br/>% reaching criterion = 100% (n=10)<br/>days to learn Go = 4.4 days<br/>days to learn Nogo = 3.9 days</p> |                                                                                                                                                                          |
|    | Figure 4 (Paraouty et al., 2020)<br>Days to criterion d' = $6.1 \pm 0.9$ days<br>% reaching criterion = 100% (n=7)<br>days to learn Go = 1.9 days<br>days to learn Nogo = 4.3 days  |                                                                                                                                                                                                  |                                                                                                                                                                                                                                                                                                                                                                                                                                                                                                                                                                                                                                                                                                                                                                                                                                                                                                                                                                                                                                                                  |                                                                                                                                                                          |
|    | Figure 4 (Paraouty et al., 2020)<br>Days to criterion d' = $8.6 \pm 1.9$ days<br>% reaching criterion = 100% (n=8)<br>days to learn Go = 4.1 days<br>days to learn Nogo = 4.5 days  |                                                                                                                                                                                                  |                                                                                                                                                                                                                                                                                                                                                                                                                                                                                                                                                                                                                                                                                                                                                                                                                                                                                                                                                                                                                                                                  |                                                                                                                                                                          |
|   | Figure 2 (Paraouty et al., 2020)<br>Days to criterion d' > 15 days<br>% reaching criterion = 0% (n=7)<br>days to learn Go > 15 days                                                 |                                                                                                                                                                                                  |                                                                                                                                                                                                                                                                                                                                                                                                                                                                                                                                                                                                                                                                                                                                                                                                                                                                                                                                                                                                                                                                  |                                                                                                                                                                          |
|  | Figure 2 (Paraouty et al., 2020)<br>Days to criterion d' = 15 days<br>% reaching criterion = 25% (n=8)<br>days to learn Go = 10.3 days<br>days to learn Nogo = 5.5 days             |                                                                                                                                                                                                  |                                                                                                                                                                                                                                                                                                                                                                                                                                                                                                                                                                                                                                                                                                                                                                                                                                                                                                                                                                                                                                                                  |                                                                                                                                                                          |
| No exposure phase                                                                  | Figure 2 (Paraouty et al., 2020)<br>Days to criterion d' = $14 \pm 1.2$ days<br>% reaching criterion = 67% (n=6)<br>days to learn Go = 9.2 days<br>days to learn Nogo = 6 days      | Exposure with non-cagemate demonstrators                                                                                                                                                         |                                                                                                                                                                                                                                                                                                                                                                                                                                                                                                                                                                                                                                                                                                                                                                                                                                                                                                                                                                                                                                                                  | Exposure with non-cagemate demonstrators + saline                                                                                                                        |
|  |                                                                                                                                                                                     | Figure 1D (current study)<br>Days to criterion d' = $3.3 \pm 0.2$ days<br>% reaching criterion = 100% (n=15)<br>days to learn Go = 1.3 days<br>days to learn Nogo = 2.4 days                     |                                                                                                                                                                                                                                                                                                                                                                                                                                                                                                                                                                                                                                                                                                                                                                                                                                                                                                                                                                                                                                                                  | Figure 2F (current study)<br>Days to criterion d' = $3.5 \pm 0.2$ days<br>% reaching criterion = 100% (n=6)<br>days to learn Go = 1 day<br>days to learn Nogo = 2.5 days |
|                                                                                    |                                                                                                                                                                                     |                                                                                                                                                                                                  | Figure 2E (current study)<br>Days to criterion d' = $7.2 \pm 0.6$ days<br>% reaching criterion = 100% (n=6)<br>days to learn Go = 3.7 days<br>days to learn Nogo = 3.5 days                                                                                                                                                                                                                                                                                                                                                                                                                                                                                                                                                                                                                                                                                                                                                                                                                                                                                      |                                                                                                                                                                          |

**Summary of all social learning paradigms tested here and in Paraouty et al. (2020).**  
Illustration of exposure sessions.
